# Supplementary material for: Persistent cortical excitatory neuron dysregulation in adult Chd8 haploinsufficient mice
Source: Research Square preprint supplement (doi:10.21203/rs.3.rs-7208668/v1), 2025-08-05
Supplement: Supplementary file 1 [file ddcd2e3ccdafd0f377c16fae.pdf]

A

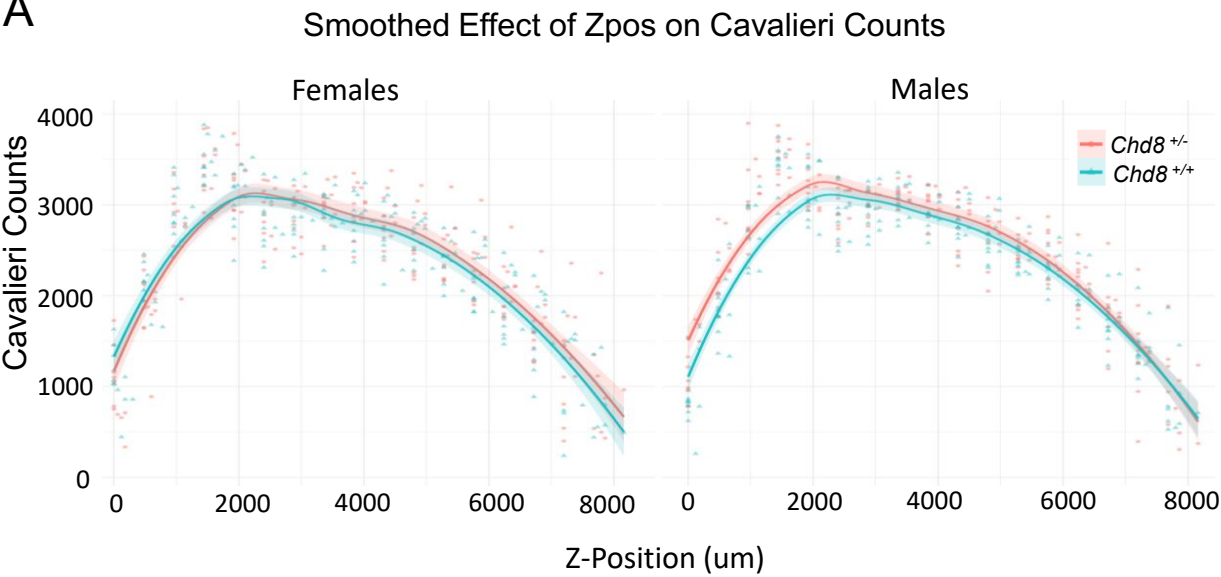

B

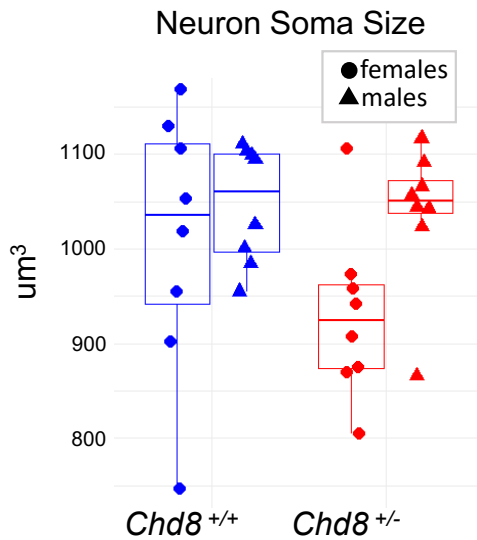

2 **Figure S1:** A) Cortical volume was quantified across rostral–caudal section in *Chd8*<sup>+/-</sup> and *Chd8*<sup>+/+</sup> mice  
3 using the Cavalieri method. In male *Chd8*<sup>+/-</sup> mice, increased volume was observed predominantly in  
4 more rostral regions, with clearer separation of genotype averages along the anterior Z-positions.  
5 Shaded portions of the plots indicate the more caudal regions (0–3000  $\mu$ m), where volume differences  
6 are most evident. B) Neuronal soma size, measured by unbiased stereology in the same rostro-caudal  
7 range, did not differ significantly between genotypes. Data are stratified by sex and genotype. Error  
8 bars represent SEM. Statistical comparisons were performed using two-way ANOVA (unstratified: P =  
9 0.23; males: P = 0.81; females: P = 0.19).



11 **Figure S2:** A) Scatterplot of log<sub>10</sub>-transformed total RNA counts (nCount\_RNA) versus detected genes  
12 (nFeature\_RNA) per cell in one batch. Custom MAD-based thresholds were chosen per batch to filter  
13 low-quality cells. Red and green dotted lines indicate nCount\_RNA and nFeature\_RNA cutoffs,  
14 respectively; cells outside these thresholds were excluded from downstream analysis. B) UMAP  
15 showing all *Chd8* mutant and wild-type nuclei integrated with BICCN data and annotated with predicted  
16 BICCN cell type labels, which are consistent with cell type identities derived from our independent  
17 annotation pipeline. C) Scatterplots comparing log fold changes (logFC) of the top 100 DEGs identified  
18 with full SoupX, non-downsampled DE analysis ("soupX") to their logFCs in the no-SoupX ("nosoupX")  
19 and downsampled to 500 nuclei + SoupX ("soupX\_ds\_500") analyses for a representative cell type.  
20 Concordance scores were calculated as the proportion of genes with the same direction of change  
21 between methods. D) Scatterplots comparing logFC of the top 100 DEGs identified with male-and-  
22 female-combined ("comb") DE analysis to their logFCs in the male and female DE analyses for a  
23 representative cell type. E) Bar plots of DEG burden across cell types (Burden = DE genes / total genes  
24 expressed \* 100) for downsampled (top) and no-SoupX (bottom) DE analyses. A permutation test with  
25 10,000 iterations was used to assess statistical significance and confirmed that the observed trends  
26 were similar to those in the full SoupX, non-downsampled analysis. F) Heatmap of normalized  
27 enrichment scores (NES) for a curated set of biologically relevant GO terms identified by GSEA  
28 performed on pseudobulk DEGs for each cell type.

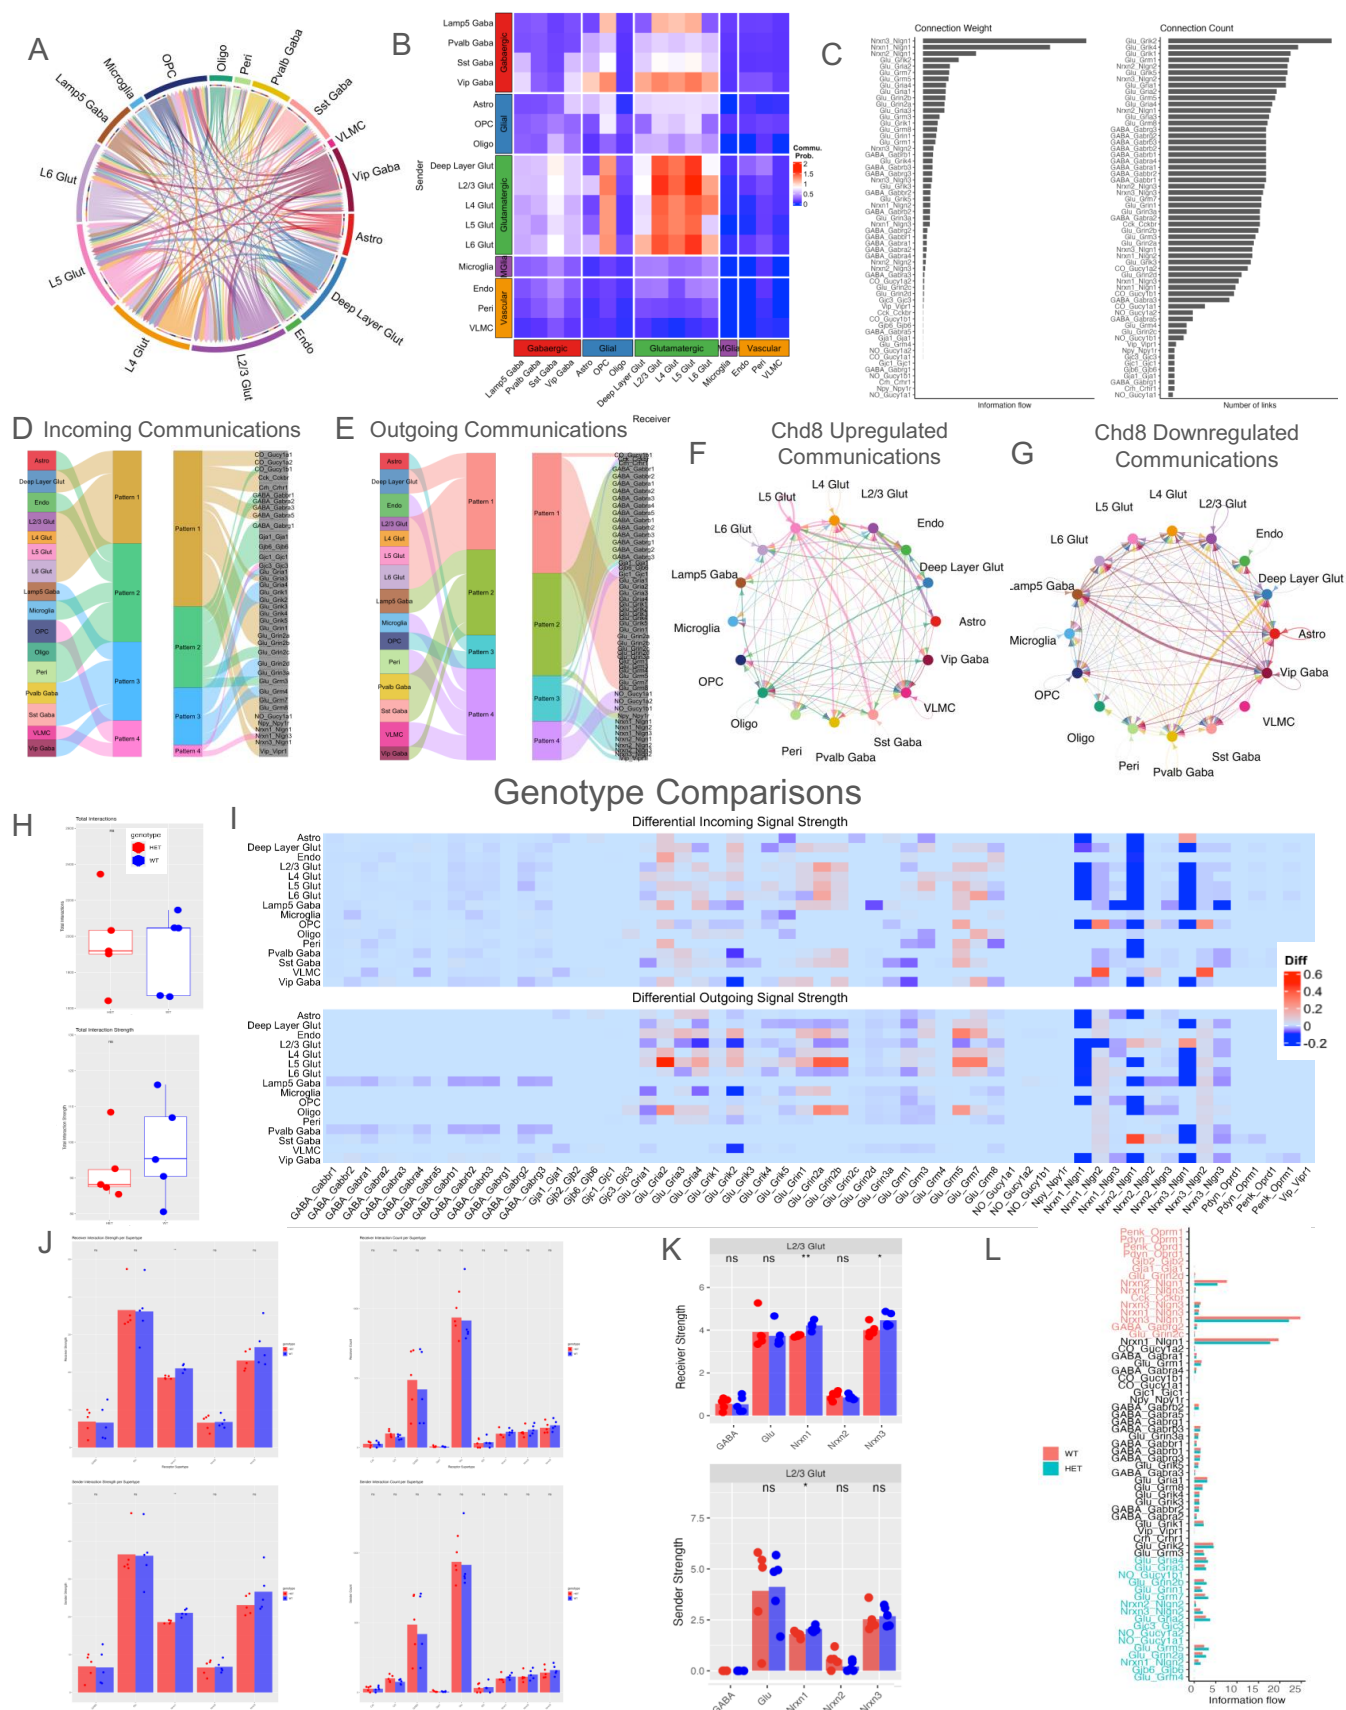

**Figure S3:** A) Overview of all inferred connections by cell type shows generally balanced co-directional signaling for each cell type. B) The communication probability is strongest within Glutamatergic cell types and between Glutamatergic and GABAergic populations. C) The strength and count of connections anchored by the listed receptor highlight networking drivers. D, E) Cell types are grouped based on the similarity of their incoming or outgoing connections showing similarities correlated with similar cell identities and neurotransmitter types. F, G) Circle plots showing the upregulated (F) and downregulated (G) intercellular communications in *Chd8*<sup>+/-</sup> compared to control. The width of each link indicates the absolute difference between *Chd8* and control, in the sum of communication strength values over all interaction pairs. H) The relative strength (top) of all network connections is similar in both WT and *Chd8*<sup>+/-</sup> ("HET") animals but the number of connections (bottom) shows some elevation in the *Chd8*<sup>+/-</sup> animals. I) Heatmap showing the differential outgoing (upper panel) and incoming (lower panel) signal strength between *Chd8*<sup>+/-</sup> and control. Given the cell group and interaction pair, the outgoing (or incoming) signal strength is defined as the sum of communication strength over the links from (or to) the cell group. The color bar indicates the difference in the outgoing (or incoming) signal strength values between *Chd8*<sup>+/-</sup> and control. Interaction pairs with signal strength of 0 for all cell types were omitted from plotting. J) Replicate level quantification of receptor supertype sender (top) and receiver (bottom) differences shows dysregulation only in the *Nrxn1* strength metrics on the level of the entire dataset. K) Further cell type specific inspection indicates that the L2/3 population is the only significantly affected population driving the dysregulation. L) Bar chart comparing the information flow between *Chd8*<sup>+/-</sup> and control for each interaction pair at the full dataset level. While the HET samples show both decreased and increased information flow in some interaction pairs, those that are increased have a vastly greater magnitude thus dominating the effects. In contrast, the increased information flow seen in the glutamate interactions is present in connections with decreased overall magnitude but is considerably consistent across each glutamate-receptor-ligand pair and reveals the glutamate network dominating the rankings of information flow increases in the HET.

**A** Distribution of pseudobulk DEGs ( $p < 0.1$ ) across modules

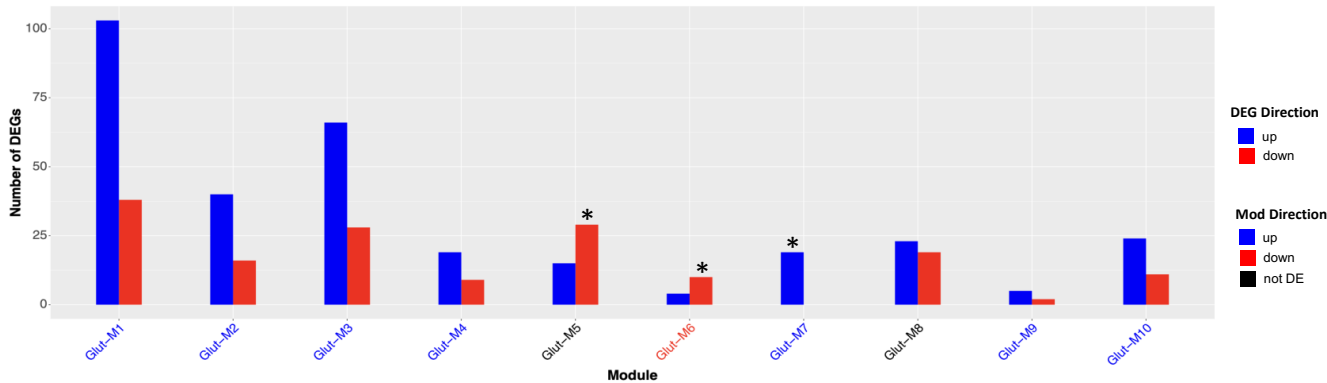

**B** Cluster-level logFC of module genes

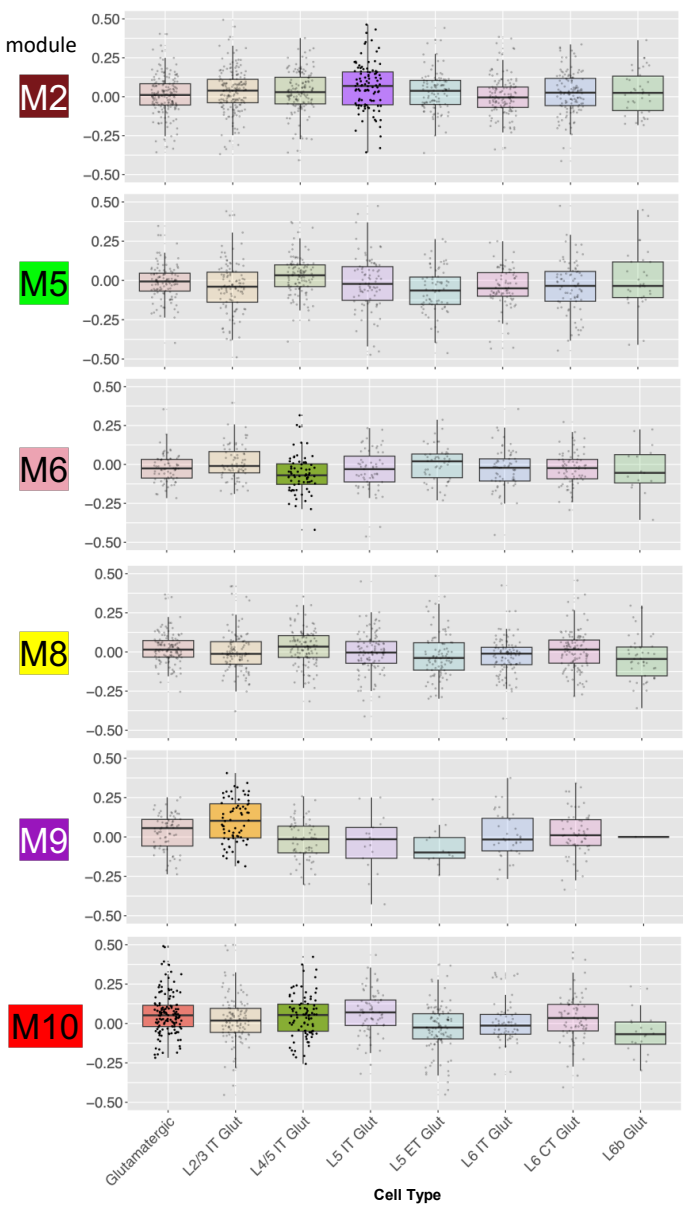

**C** Sample-level logFC of representative module genes

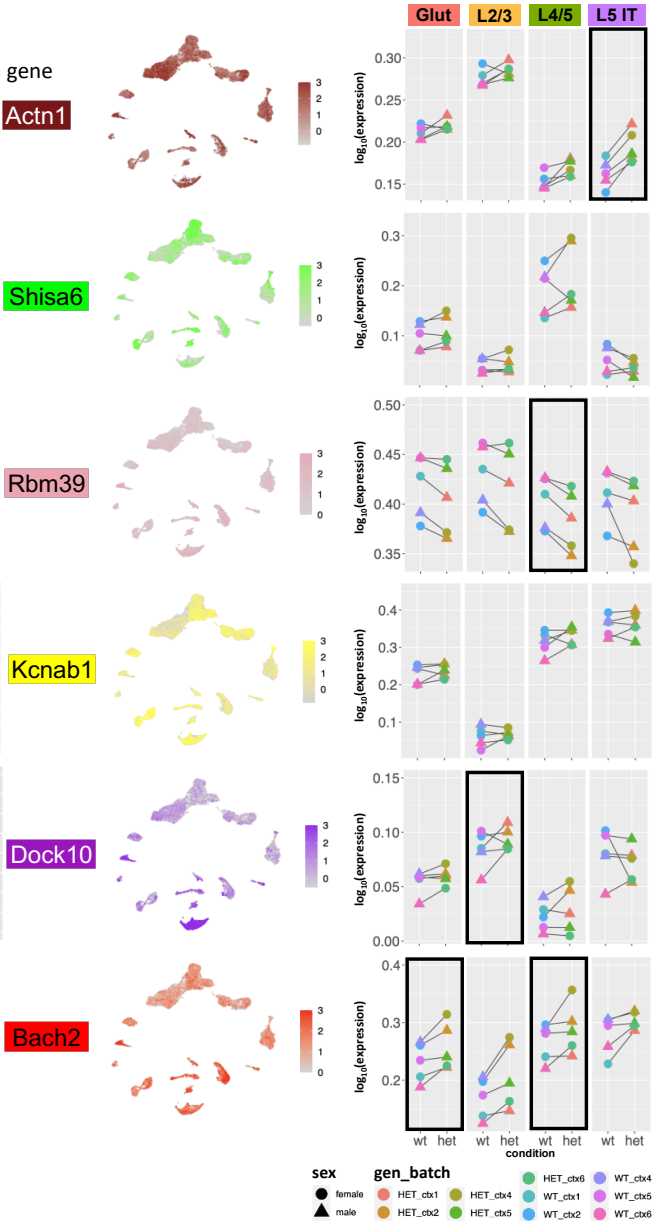

56 **Figure S4:** A) Bar plot showing the distribution of DEGs ( $p < 0.1$ ) across glutamatergic modules. Bars  
57 indicate the number of genes upregulated (blue) or downregulated (red) in at least one cell type per  
58 module. Modules Glut-M5 and Glut-M6 showed significant enrichment for downregulated DEGs  
59 (Fisher's exact test, FDR-adjusted  $*p < 0.05$ ), while Glut-M7 showed significant enrichment for  
60 upregulated DEGs. Overall, the direction of module-level change tends to agree with the predominant  
61 direction of DE for the genes within each module. B) Box plots for the remaining glutamatergic  
62 modules, showing logFCs of module genes across cell types. Opaque boxes indicate subtypes where  
63 the module is significantly differentially expressed (Student's t-test comparing mean logFC of each  
64 module to grey module, Bonferroni-adjusted  $p < 0.05$ ). C) Feature plots (left) show relative expression  
65 of representative genes from each module in UMAP space. Dot plots (right) display median sample-  
66 level expression of the same genes. Black boxes highlight subtypes where the module is differentially  
67 expressed or where consistent directional changes are observed across batches.



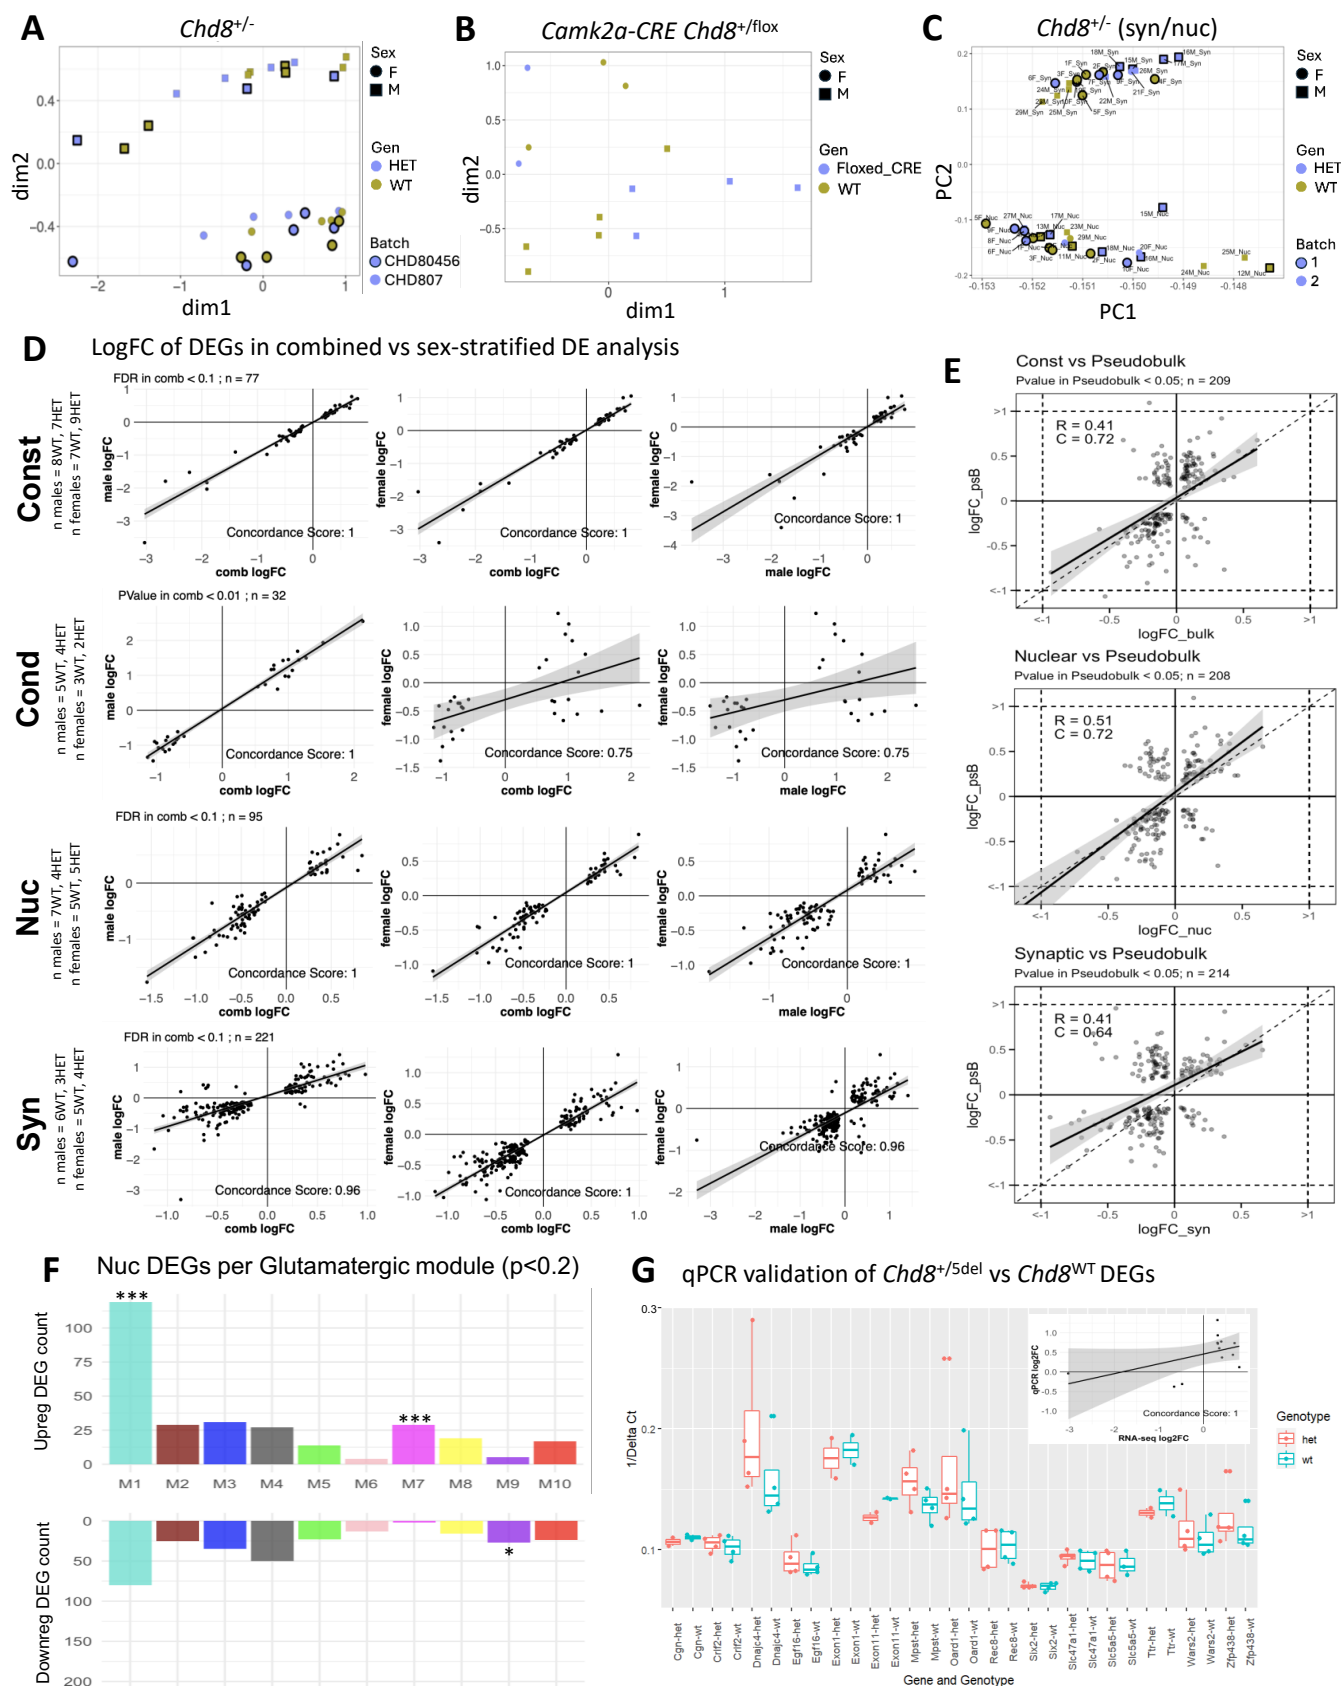

69 **Figure S5:** A-B) MDS plot of cortical *Chd8* mutant (A: *Chd8*<sup>+/-</sup>, B: *Camk2a-CRE Chd8*<sup>+/-lox</sup>) and WT  
 70 samples, with the second dimension ("dim2") reflecting biological sex. C) PCA plot of cortical  
 71 *Chd8*<sup>+/-</sup> and *Chd8*<sup>WT</sup> synaptic and nuclear samples, where leading dimensions distinguish sample  
 72 fraction. D) Log fold change (logFC) concordance scatterplots comparing logFC of DEGs from the  
 73 combined ("comb") analysis to their logFCs in each of the sex-stratified analyses ("male", "female").  
 74 Only genes passing FDR < 0.1 or P < 0.01 in combined datasets were used for comparisons. Each row  
 75 represents one of 4 bulk RNA-seq datasets: constitutive *Chd8*<sup>+/-</sup> ("Const"), conditional *Camk2a-CRE*  
 76 *Chd8*<sup>+/-lox</sup> ("Cond"), nuclear fraction of *Chd8*<sup>+/-</sup> ("Nuc"), and synaptic fraction of *Chd8*<sup>+/-</sup> ("Syn"). Plots  
 77 display gene-level logFC correlations between pairs of analyses with linear regression fits and  
 78 concordance scores indicating the fraction of genes regulated in the same direction. E) LogFC  
 79 scatterplots comparing constitutive *Chd8*<sup>+/-</sup> ("Const") to pseudobulk snRNA-seq DEGs (top), nuclear  
 80 fraction *Chd8*<sup>+/-</sup> ("Nuc") to pseudobulk DEGs (middle), and synaptic fraction *Chd8*<sup>+/-</sup> ("Syn") to  
 81 pseudobulk DEGs. Genes were selected based on significance in pseudobulk analysis (P < 0.05) and  
 82 differential expression in each respective bulk RNA-seq analysis. Pearson correlation coefficients (R)  
 83 and concordance scores (C) are shown on each plot. F) Bar plots showing counts of nuclear  
 84 differentially expressed genes (DEGs) per module, separated into upregulated (top) and downregulated  
 85 (bottom). Enrichment was assessed using Fisher's exact test, comparing the proportion of up- vs.  
 86 downregulated DEGs in each module relative to all other modules, with multiple testing correction  
 87 (Benjamini-Hochberg). M1 and M7 were significantly enriched for upregulated DEGs (p\*\*\* < 0.001),  
 88 while M9 was enriched for downregulated DEGs (p\* < 0.05). G) Box plots showing the median 1/ΔCt  
 89 (relative to GAPDH) across biological replicates for 13 constitutive *Chd8*<sup>+/-</sup> bulk RNA-seq DEGs. *Chd8*  
 90 Exons 1 and 11 ("Exon1", "Exon 11") were included as positive controls. A Wilcoxon test showed  
 91 nonsignificant differences in 1/ΔCt between *Chd8* mutants and wild-types, all 13 genes tested showed  
 92 the same direction of change as RNA-seq DE analysis. Inset shows scatterplot of RNA-seq logFC  
 93 versus qPCR logFC, with concordance calculated as in (D-E).  
 94
